# Supplementary material for: Why does the cyclic pentazolate anion fail to undergo N-oxidization in oxone solution?
Source: Royal Society of Chemistry journal article supplement (doi:10.1039/d3nj00215b), 2023-01-01
Supplement: d3nj00215b1.pdf [file d3nj00215b1.pdf]

## Electronic Supplementary Information

### **Why can't *cyclo*-pentazolate anion in Oxone solution be *N*-oxidized?**

Ze Xu,<sup>‡</sup> Shuaijie Jiang,<sup>‡</sup> Tianyang Hou, Xiaopeng Zhang, Ming Lu\* and Yuangang Xu\*

School of Chemistry and Chemical Engineering, Nanjing University of Science and  
Technology, Nanjing 210094, Jiangsu, China

<sup>‡</sup> These authors contributed equally.

E-mail: [luming@njust.edu.cn](mailto:luming@njust.edu.cn); [yuangangxu@163.com](mailto:yuangangxu@163.com)

## Table of Contents

|                                                           |     |
|-----------------------------------------------------------|-----|
| 1. Single-crystal X-ray diffraction analysis              | S3  |
| 2. Mass spectra                                           | S9  |
| 3. IR spectrum                                            | S10 |
| 4. Hirshfeld surface and two-dimensional fingerprint plot | S10 |
| 5. Surface electrostatic potential                        | S11 |
| 6. DSC curve                                              | S11 |
| 7. Experimental section                                   | S12 |
| 8. Computational methods                                  | S14 |
| References                                                | S16 |

## 1. Single-crystal X-ray diffraction analysis

**Table S1.** Crystal data, data collection, and refinement for compound **1**

|                                                                                                                                                                                                                                                                                      |                                                                                     |
|--------------------------------------------------------------------------------------------------------------------------------------------------------------------------------------------------------------------------------------------------------------------------------------|-------------------------------------------------------------------------------------|
| $C_4H_7N_5Na_2O_4$                                                                                                                                                                                                                                                                   | $Z = 2$                                                                             |
| $M_r = 235.13$                                                                                                                                                                                                                                                                       | $F(000) = 240$                                                                      |
| Triclinic, $P\bar{1}$                                                                                                                                                                                                                                                                | $D_x = 1.709 \text{ Mg m}^{-3}$                                                     |
| $a = 6.8450 (7) \text{ \AA}$                                                                                                                                                                                                                                                         | Mo $K\alpha$ radiation, $\lambda = 0.71073 \text{ \AA}$                             |
| $b = 7.2316 (7) \text{ \AA}$                                                                                                                                                                                                                                                         | Cell parameters from 3422 reflections                                               |
| $c = 10.2686 (10) \text{ \AA}$                                                                                                                                                                                                                                                       | $\theta = 3.0\text{--}27.5^\circ$                                                   |
| $\alpha = 71.886 (4)^\circ$                                                                                                                                                                                                                                                          | $\mu = 0.22 \text{ mm}^{-1}$                                                        |
| $\beta = 71.147 (4)^\circ$                                                                                                                                                                                                                                                           | $T = 100 \text{ K}$                                                                 |
| $\gamma = 82.079 (4)^\circ$                                                                                                                                                                                                                                                          | Plate, colourless                                                                   |
| $V = 456.80 (8) \text{ \AA}^3$                                                                                                                                                                                                                                                       | $0.12 \times 0.05 \times 0.04 \text{ mm}$                                           |
| Bruker APEX-II CCD diffractometer                                                                                                                                                                                                                                                    | 1818 reflections with $I > 2\sigma(I)$                                              |
| $\phi$ and $\omega$ scans                                                                                                                                                                                                                                                            | $\theta_{\max} = 27.5^\circ$ , $\theta_{\min} = 3.0^\circ$                          |
| Absorption correction: multi-scan <i>SADABS2016/2</i> (Bruker,2016/2) was used for absorption correction. $wR2(\text{int})$ was 0.0690 before and 0.0456 after correction. The Ratio of minimum to maximum transmission is 0.9149. The $\lambda/2$ correction factor is Not present. | $h = -8?8$                                                                          |
| $T_{\min} = 0.849$ , $T_{\max} = 0.928$                                                                                                                                                                                                                                              | $k = -9?9$                                                                          |
| 2047 measured reflections                                                                                                                                                                                                                                                            | $l = -9?13$                                                                         |
| 2047 independent reflections                                                                                                                                                                                                                                                         |                                                                                     |
| Refinement on $F^2$                                                                                                                                                                                                                                                                  | Primary atom site location: dual                                                    |
| Least-squares matrix: full                                                                                                                                                                                                                                                           | Hydrogen site location: inferred from neighbouring sites                            |
| $R[F^2 > 2\sigma(F^2)] = 0.042$                                                                                                                                                                                                                                                      | H-atom parameters constrained                                                       |
| $wR(F^2) = 0.104$                                                                                                                                                                                                                                                                    | $w = 1/[\sigma^2(F_o^2) + (0.0242P)^2 + 0.6514P]$<br>where $P = (F_o^2 + 2F_c^2)/3$ |
| $S = 1.09$                                                                                                                                                                                                                                                                           | $(\Delta/\sigma)_{\max} < 0.001$                                                    |
| 2047 reflections                                                                                                                                                                                                                                                                     | $\Delta\rho_{\max} = 0.34 \text{ e \AA}^{-3}$                                       |
| 140 parameters                                                                                                                                                                                                                                                                       | $\Delta\rho_{\min} = -0.36 \text{ e \AA}^{-3}$                                      |
| 0 restraints                                                                                                                                                                                                                                                                         |                                                                                     |

**Table S2.** Fractional atomic coordinates and isotropic or equivalent isotropic displacement parameters ( $\text{\AA}^2$ ) for compound **1**

|     | <i>x</i>     | <i>y</i>     | <i>z</i>     | $U_{\text{iso}}^*/U_{\text{eq}}$ |
|-----|--------------|--------------|--------------|----------------------------------|
| Na2 | 1.03809 (13) | 0.80008 (12) | 0.84582 (9)  | 0.0136 (2)                       |
| Na1 | 0.87369 (13) | 0.78441 (12) | 0.55587 (9)  | 0.0141 (2)                       |
| O2  | 0.1927 (2)   | 0.8741 (2)   | 0.57720 (16) | 0.0149 (3)                       |
| O3  | 0.7198 (2)   | 0.8052 (2)   | 0.80269 (16) | 0.0175 (3)                       |
| O1  | 0.5075 (2)   | 0.7556 (2)   | 0.59000 (16) | 0.0173 (3)                       |
| O4  | 0.3885 (2)   | 0.7630 (3)   | 0.83878 (17) | 0.0204 (4)                       |
| H4  | 0.433535     | 0.757480     | 0.753611     | 0.031*                           |
| N2  | 0.9590 (3)   | 0.8367 (3)   | 0.19393 (19) | 0.0154 (4)                       |
| N3  | 0.9538 (3)   | 0.7272 (3)   | 0.11261 (19) | 0.0155 (4)                       |
| N1  | 0.9759 (3)   | 0.7184 (3)   | 0.31793 (19) | 0.0152 (4)                       |
| N4  | 0.9667 (3)   | 0.5424 (3)   | 0.18661 (19) | 0.0167 (4)                       |
| N5  | 0.9824 (3)   | 0.5373 (3)   | 0.3133 (2)   | 0.0173 (4)                       |
| C1  | 0.3666 (3)   | 0.8029 (3)   | 0.5258 (2)   | 0.0135 (4)                       |
| C3  | 0.5418 (3)   | 0.7757 (3)   | 0.8832 (2)   | 0.0156 (4)                       |
| C2  | 0.4247 (4)   | 0.7627 (3)   | 0.3829 (2)   | 0.0188 (5)                       |
| H2A | 0.435008     | 0.621688     | 0.397075     | 0.028*                           |
| H2B | 0.558266     | 0.818614     | 0.323217     | 0.028*                           |
| H2C | 0.318938     | 0.821468     | 0.335222     | 0.028*                           |
| C4  | 0.4870 (4)   | 0.7491 (4)   | 1.0416 (2)   | 0.0243 (5)                       |
| H4A | 0.607323     | 0.774423     | 1.064569     | 0.036*                           |
| H4B | 0.445420     | 0.615311     | 1.094138     | 0.036*                           |
| H4C | 0.372622     | 0.840265     | 1.069613     | 0.036*                           |

**Table S3.** Atomic displacement parameters ( $\text{\AA}^2$ ) for compound **1**

|     | $U^{11}$   | $U^{22}$    | $U^{33}$   | $U^{12}$    | $U^{13}$    | $U^{23}$    |
|-----|------------|-------------|------------|-------------|-------------|-------------|
| Na2 | 0.0139 (4) | 0.0157 (4)  | 0.0112 (4) | -0.0013 (3) | -0.0037 (3) | -0.0034 (3) |
| Na1 | 0.0154 (4) | 0.0153 (4)  | 0.0116 (4) | -0.0002 (3) | -0.0046 (3) | -0.0033 (3) |
| O2  | 0.0138 (8) | 0.0163 (8)  | 0.0131 (7) | -0.0008 (6) | -0.0031 (6) | -0.0030 (6) |
| O3  | 0.0158 (8) | 0.0220 (8)  | 0.0154 (7) | -0.0001 (6) | -0.0052 (6) | -0.0059 (6) |
| O1  | 0.0151 (8) | 0.0231 (8)  | 0.0151 (7) | -0.0002 (6) | -0.0063 (6) | -0.0059 (6) |
| O4  | 0.0156 (8) | 0.0332 (10) | 0.0134 (7) | -0.0017 (7) | -0.0041 (6) | -0.0080 (7) |

|    |             |             |             |              |             |              |
|----|-------------|-------------|-------------|--------------|-------------|--------------|
| N2 | 0.0150 (9)  | 0.0178 (9)  | 0.0128 (8)  | -0.0007 (7)  | -0.0037 (7) | -0.0041 (7)  |
| N3 | 0.0155 (9)  | 0.0177 (9)  | 0.0129 (8)  | -0.0012 (7)  | -0.0048 (7) | -0.0032 (7)  |
| N1 | 0.0157 (9)  | 0.0155 (9)  | 0.0135 (8)  | -0.0015 (7)  | -0.0033 (7) | -0.0035 (7)  |
| N4 | 0.0199 (10) | 0.0174 (9)  | 0.0136 (9)  | -0.0001 (7)  | -0.0075 (7) | -0.0035 (7)  |
| N5 | 0.0209 (10) | 0.0172 (9)  | 0.0145 (9)  | -0.0025 (7)  | -0.0064 (7) | -0.0035 (7)  |
| C1 | 0.0173 (11) | 0.0104 (9)  | 0.0118 (9)  | -0.0036 (8)  | -0.0044 (8) | -0.0002 (8)  |
| C3 | 0.0154 (11) | 0.0183 (11) | 0.0143 (10) | 0.0027 (8)   | -0.0055 (8) | -0.0064 (8)  |
| C2 | 0.0187 (12) | 0.0248 (12) | 0.0145 (10) | -0.0002 (9)  | -0.0056 (9) | -0.0070 (9)  |
| C4 | 0.0225 (12) | 0.0360 (14) | 0.0145 (11) | -0.0022 (10) | -0.0049 (9) | -0.0076 (10) |

**Table S4.** Geometric parameters (Å, °) for compound **1**

|                                        |             |                         |            |
|----------------------------------------|-------------|-------------------------|------------|
| Na2—Na1                                | 3.5432 (12) | O1—C1                   | 1.289 (3)  |
| Na2—Na1 <sup>i</sup>                   | 4.1941 (12) | O4—H4                   | 0.8400     |
| Na2—O2 <sup>ii</sup>                   | 2.5232 (17) | O4—C3                   | 1.296 (3)  |
| Na2—O3                                 | 2.3526 (18) | N2—N3                   | 1.328 (3)  |
| Na2—O4 <sup>ii</sup>                   | 2.3565 (18) | N2—N1                   | 1.325 (3)  |
| Na2—N2 <sup>i</sup>                    | 2.532 (2)   | N3—N4                   | 1.323 (3)  |
| Na2—N3 <sup>iii</sup>                  | 2.506 (2)   | N1—N5                   | 1.320 (3)  |
| Na2—N4 <sup>iv</sup>                   | 2.605 (2)   | N4—N5                   | 1.328 (3)  |
| Na1—Na1 <sup>i</sup>                   | 3.4653 (17) | C1—C2                   | 1.500 (3)  |
| Na1—O2 <sup>ii</sup>                   | 2.4546 (18) | C3—C4                   | 1.502 (3)  |
| Na1—O2 <sup>v</sup>                    | 2.4829 (17) | C2—H2A                  | 0.9800     |
| Na1—O3                                 | 2.4544 (18) | C2—H2B                  | 0.9800     |
| Na1—O1                                 | 2.4454 (18) | C2—H2C                  | 0.9800     |
| Na1—N1                                 | 2.493 (2)   | C4—H4A                  | 0.9800     |
| Na1—N5 <sup>iv</sup>                   |             | C4—H4B                  | 0.9800     |
| O2—C1                                  | 1.247 (3)   | C4—H4C                  | 0.9800     |
| O3—C3                                  | 1.235 (3)   |                         |            |
|                                        |             |                         |            |
| Na1—Na2—Na1 <sup>i</sup>               | 52.39 (3)   | O1—Na1—N1               | 91.89 (6)  |
| O2 <sup>ii</sup> —Na2—Na1 <sup>i</sup> | 32.79 (4)   | O1—Na1—N5 <sup>iv</sup> | 109.31 (7) |
| O2 <sup>ii</sup> —Na2—Na1              | 43.85 (4)   | N1—Na1—Na2              | 146.29 (6) |
| O2 <sup>ii</sup> —Na2—N2 <sup>i</sup>  | 85.87 (6)   | N1—Na1—Na2 <sup>i</sup> | 53.38 (5)  |
| O2 <sup>ii</sup> —Na2—N4 <sup>iv</sup> | 79.68 (6)   | N1—Na1—Na1 <sup>i</sup> | 97.39 (6)  |
| O3—Na2—Na1 <sup>i</sup>                | 77.83 (5)   | N1—Na1—N5 <sup>iv</sup> | 96.15 (7)  |

|                                         |            |                                         |             |
|-----------------------------------------|------------|-----------------------------------------|-------------|
| O3—Na2—Na1                              | 43.64 (4)  | N5 <sup>iv</sup> —Na1—Na2               | 64.85 (5)   |
| O3—Na2—O2 <sup>ii</sup>                 | 85.51 (6)  | N5 <sup>iv</sup> —Na1—Na2 <sup>i</sup>  | 143.14 (5)  |
| O3—Na2—O4 <sup>ii</sup>                 | 165.49 (7) | N5 <sup>iv</sup> —Na1—Na1 <sup>i</sup>  | 122.26 (6)  |
| O3—Na2—N2 <sup>i</sup>                  | 96.12 (6)  | Na1 <sup>v</sup> —O2—Na2 <sup>vi</sup>  | 113.82 (6)  |
| O3—Na2—N3 <sup>iii</sup>                | 105.37 (7) | Na1 <sup>vi</sup> —O2—Na2 <sup>vi</sup> | 90.75 (6)   |
| O3—Na2—N4 <sup>iv</sup>                 | 76.35 (6)  | Na1 <sup>vi</sup> —O2—Na1 <sup>v</sup>  | 89.15 (6)   |
| O4 <sup>ii</sup> —Na2—Na1 <sup>i</sup>  | 95.94 (5)  | C1—O2—Na2 <sup>vi</sup>                 | 119.84 (13) |
| O4 <sup>ii</sup> —Na2—Na1               | 122.45 (5) | C1—O2—Na1 <sup>vi</sup>                 | 123.08 (14) |
| O4 <sup>ii</sup> —Na2—O2 <sup>ii</sup>  | 82.39 (6)  | C1—O2—Na1 <sup>v</sup>                  | 114.60 (13) |
| O4 <sup>ii</sup> —Na2—N2 <sup>i</sup>   | 90.98 (7)  | Na2—O3—Na1                              | 94.94 (6)   |
| O4 <sup>ii</sup> —Na2—N3 <sup>iii</sup> | 86.82 (6)  | C3—O3—Na2                               | 132.68 (14) |
| O4 <sup>ii</sup> —Na2—N4 <sup>iv</sup>  | 93.56 (7)  | C3—O3—Na1                               | 129.90 (14) |
| N2 <sup>i</sup> —Na2—Na1                | 101.58 (5) | C1—O1—Na1                               | 143.36 (14) |
| N2 <sup>i</sup> —Na2—Na1 <sup>i</sup>   | 55.86 (4)  | Na2 <sup>vi</sup> —O4—H4                | 95.1        |
| N2 <sup>i</sup> —Na2—N4 <sup>iv</sup>   | 164.13 (7) | C3—O4—Na2 <sup>vi</sup>                 | 153.78 (14) |
| N3 <sup>iii</sup> —Na2—Na1              | 146.53 (6) | C3—O4—H4                                | 109.5       |
| N3 <sup>iii</sup> —Na2—Na1 <sup>i</sup> | 148.64 (5) | N3—N2—Na2 <sup>i</sup>                  | 134.03 (14) |
| N3 <sup>iii</sup> —Na2—O2 <sup>ii</sup> | 169.12 (7) | N1—N2—Na2 <sup>i</sup>                  | 118.16 (14) |
| N3 <sup>iii</sup> —Na2—N2 <sup>i</sup>  | 92.95 (6)  | N1—N2—N3                                | 107.72 (17) |
| N3 <sup>iii</sup> —Na2—N4 <sup>iv</sup> | 102.48 (7) | N2—N3—Na2 <sup>vii</sup>                | 131.33 (14) |
| N4 <sup>iv</sup> —Na2—Na1               | 63.29 (5)  | N4—N3—Na2 <sup>vii</sup>                | 117.06 (13) |
| N4 <sup>iv</sup> —Na2—Na1 <sup>i</sup>  | 108.48 (5) | N4—N3—N2                                | 108.07 (17) |
| Na2—Na1—Na2 <sup>i</sup>                | 127.61 (3) | N2—N1—Na1                               | 128.45 (14) |
| Na1 <sup>i</sup> —Na1—Na2 <sup>i</sup>  | 54.10 (3)  | N5—N1—Na1                               | 119.09 (13) |
| Na1 <sup>i</sup> —Na1—Na2               | 73.51 (3)  | N5—N1—N2                                | 108.31 (17) |
| O2 <sup>v</sup> —Na1—Na2                | 107.33 (5) | N3—N4—Na2 <sup>iv</sup>                 | 138.11 (14) |
| O2 <sup>ii</sup> —Na1—Na2               | 45.40 (4)  | N3—N4—N5                                | 107.94 (17) |
| O2 <sup>v</sup> —Na1—Na2 <sup>i</sup>   | 33.39 (4)  | N5—N4—Na2 <sup>iv</sup>                 | 113.94 (13) |
| O2 <sup>ii</sup> —Na1—Na2 <sup>i</sup>  | 90.96 (4)  | N1—N5—Na1 <sup>iv</sup>                 | 133.89 (14) |
| O2 <sup>v</sup> —Na1—Na1 <sup>i</sup>   | 45.10 (4)  | N1—N5—N4                                | 107.95 (17) |
| O2 <sup>ii</sup> —Na1—Na1 <sup>i</sup>  | 45.76 (4)  | N4—N5—Na1 <sup>iv</sup>                 | 114.57 (14) |
| O2 <sup>ii</sup> —Na1—O2 <sup>v</sup>   | 90.85 (6)  | O2—C1—O1                                | 123.64 (19) |
| O2 <sup>v</sup> —Na1—N1                 | 85.48 (6)  | O2—C1—C2                                | 121.33 (19) |
| O2 <sup>ii</sup> —Na1—N1                | 105.15 (6) | O1—C1—C2                                | 115.03 (19) |

|                                             |              |                             |              |
|---------------------------------------------|--------------|-----------------------------|--------------|
| O2 <sup>ii</sup> —Na1—N5 <sup>iv</sup>      | 76.52 (6)    | O3—C3—O4                    | 123.1 (2)    |
| O2 <sup>v</sup> —Na1—N5 <sup>iv</sup>       | 167.28 (7)   | O3—C3—C4                    | 122.2 (2)    |
| O3—Na1—Na2 <sup>i</sup>                     | 132.76 (5)   | O4—C3—C4                    | 114.7 (2)    |
| O3—Na1—Na2                                  | 41.42 (4)    | C1—C2—H2A                   | 109.5        |
| O3—Na1—Na1 <sup>i</sup>                     | 93.15 (5)    | C1—C2—H2B                   | 109.5        |
| O3—Na1—O2 <sup>v</sup>                      | 99.51 (6)    | C1—C2—H2C                   | 109.5        |
| O3—Na1—O2 <sup>ii</sup>                     | 84.87 (6)    | H2A—C2—H2B                  | 109.5        |
| O3—Na1—N1                                   | 168.84 (7)   | H2A—C2—H2C                  | 109.5        |
| O3—Na1—N5 <sup>iv</sup>                     | 81.20 (6)    | H2B—C2—H2C                  | 109.5        |
| O1—Na1—Na2                                  | 120.03 (5)   | C3—C4—H4A                   | 109.5        |
| O1—Na1—Na2 <sup>i</sup>                     | 93.56 (4)    | C3—C4—H4B                   | 109.5        |
| O1—Na1—Na1 <sup>i</sup>                     | 125.93 (6)   | C3—C4—H4C                   | 109.5        |
| O1—Na1—O2 <sup>ii</sup>                     | 161.49 (6)   | H4A—C4—H4B                  | 109.5        |
| O1—Na1—O2 <sup>v</sup>                      | 83.20 (6)    | H4A—C4—H4C                  | 109.5        |
| O1—Na1—O3                                   | 78.90 (6)    | H4B—C4—H4C                  | 109.5        |
|                                             |              |                             |              |
| Na2 <sup>vi</sup> —O2—C1—O1                 | -27.3 (3)    | Na1 <sup>vi</sup> —O2—C1—C2 | 38.6 (3)     |
| Na2 <sup>vi</sup> —O2—C1—C2                 | 151.63 (16)  | Na1—O3—C3—O4                | -14.0 (3)    |
| Na2—O3—C3—O4                                | -171.51 (15) | Na1—O3—C3—C4                | 165.19 (16)  |
| Na2—O3—C3—C4                                | 7.7 (3)      | Na1—O1—C1—O2                | -132.4 (2)   |
| Na2 <sup>vi</sup> —O4—C3—O3                 | -148.8 (3)   | Na1—O1—C1—C2                | 48.7 (3)     |
| Na2 <sup>vi</sup> —O4—C3—C4                 | 32.0 (4)     | Na1—N1—N5—Na1 <sup>iv</sup> | -45.2 (2)    |
| Na2 <sup>i</sup> —N2—N3—Na2 <sup>vii</sup>  | 19.0 (3)     | Na1—N1—N5—N4                | 158.18 (14)  |
| Na2 <sup>i</sup> —N2—N3—N4                  | 176.55 (15)  | N2—N3—N4—Na2 <sup>iv</sup>  | 177.67 (16)  |
| Na2 <sup>i</sup> —N2—N1—Na1                 | 26.9 (2)     | N2—N3—N4—N5                 | -0.7 (2)     |
| Na2 <sup>i</sup> —N2—N1—N5                  | -176.62 (13) | N2—N1—N5—Na1 <sup>iv</sup>  | 155.81 (16)  |
| Na2 <sup>vii</sup> —N3—N4—Na2 <sup>iv</sup> | -21.1 (3)    | N2—N1—N5—N4                 | -0.8 (2)     |
| Na2 <sup>vii</sup> —N3—N4—N5                | 160.47 (14)  | N3—N2—N1—Na1                | -156.07 (14) |
| Na2 <sup>iv</sup> —N4—N5—Na1 <sup>iv</sup>  | 20.44 (18)   | N3—N2—N1—N5                 | 0.4 (2)      |
| Na2 <sup>iv</sup> —N4—N5—N1                 | -177.86 (13) | N3—N4—N5—Na1 <sup>iv</sup>  | -160.73 (14) |
| Na1 <sup>vi</sup> —O2—C1—O1                 | -140.31 (17) | N3—N4—N5—N1                 | 1.0 (2)      |
| Na1 <sup>v</sup> —O2—C1—O1                  | 113.51 (19)  | N1—N2—N3—Na2 <sup>vii</sup> | -157.32 (15) |
| Na1 <sup>v</sup> —O2—C1—C2                  | -67.6 (2)    | N1—N2—N3—N4                 | 0.2 (2)      |

Symmetry codes: (i) -x+2, -y+2, -z+1; (ii) x+1, y, z; (iii) x, y, z+1; (iv) -x+2, -y+1, -z+1; (v) -x+1, -y+2, -z+1; (vi) x-1, y, z; (vii) x, y, z-1.

**Table S5.** Hydrogen bonds (Å, °) for compound **1**

| $D-H\cdots A$      | $D-H$ | $H\cdots A$ | $D\cdots A$ | $D-H\cdots A$ |
|--------------------|-------|-------------|-------------|---------------|
| O4—H4 $\cdots$ O1  | 0.84  | 1.59        | 2.433 (2)   | 177           |
| C4—H4A $\cdots$ N3 | 0.98  | 2.53        | 3.473 (4)   | 161           |

Symmetry code: (ii)  $-x, -x+y, -z+5/3$ .

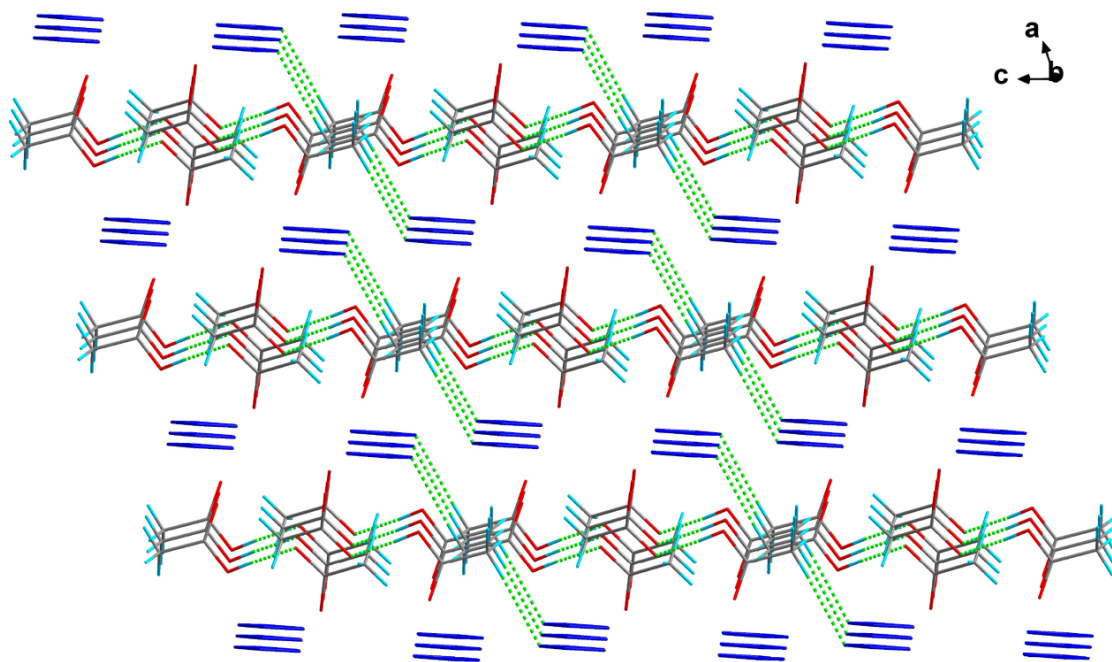

**Fig. S1** Stacking diagram of **1**. Dashed lines indicate hydrogen bonding.



## 2. Mass spectra

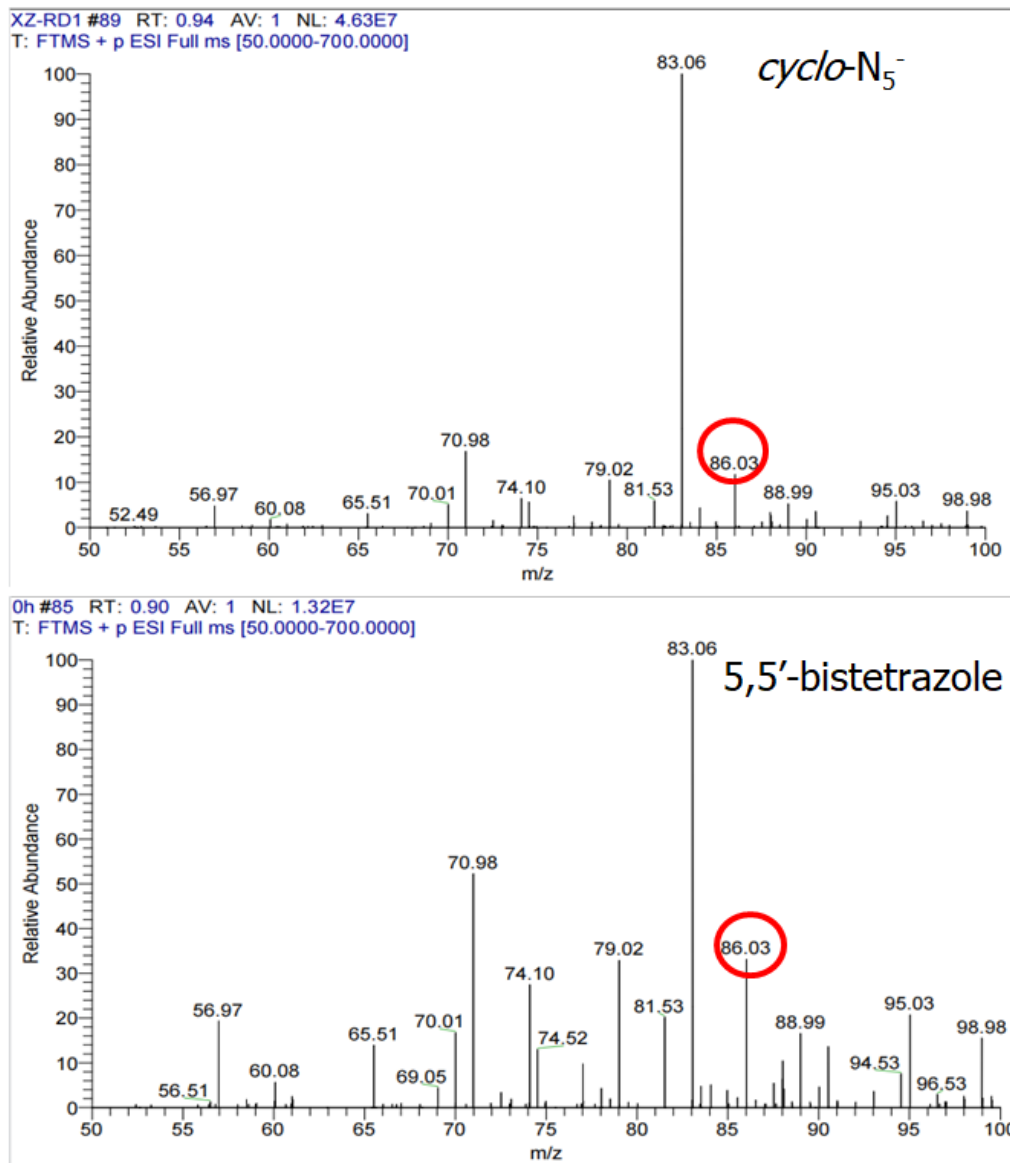

**Fig. S2** The mass spectra of compound **1** and 5,5'-bistetrazole.

### 3. IR spectrum

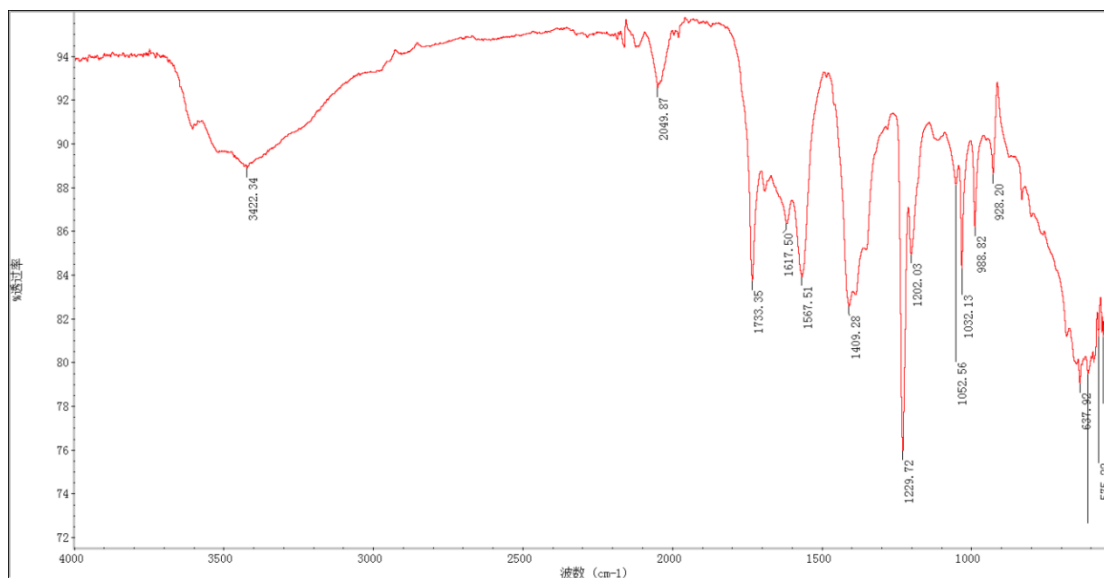

**Fig. S3** The IR spectrum of compound **1**.

### 4. Hirshfeld surface and two-dimensional fingerprint plot

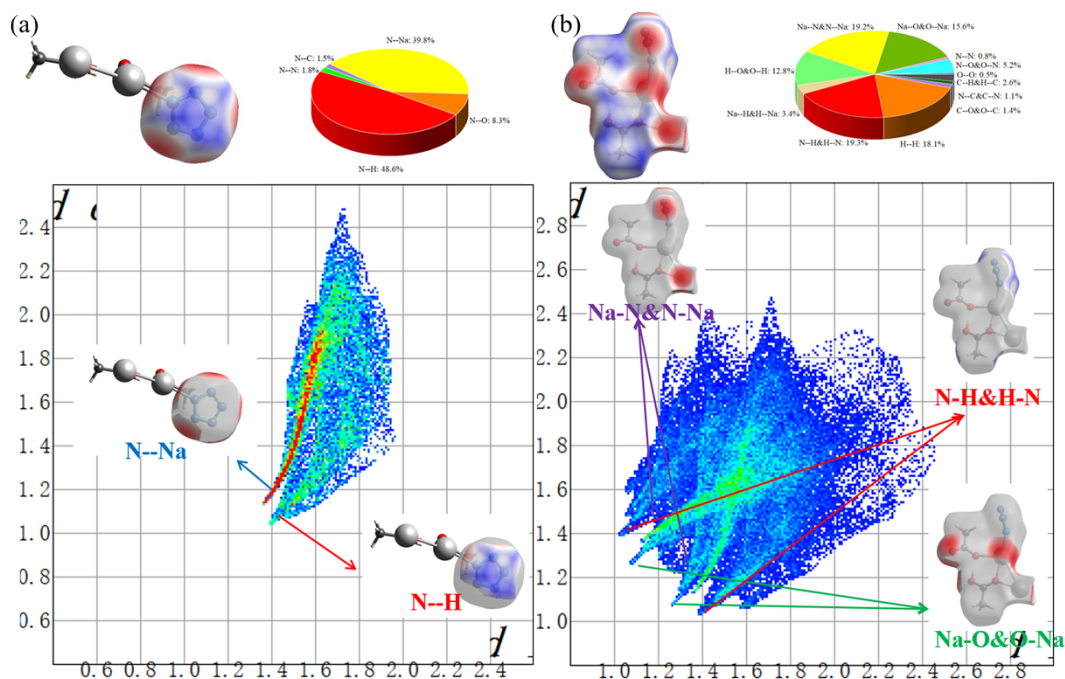

**Fig. S4** (a) Hirshfeld surfaces of *cyclo-N<sub>5</sub><sup>-</sup>* in **1**, pie graph for individual atomic contacts percentage contribution to the Hirshfeld surface and two-dimensional fingerprint plot in crystal stacking for *cyclo-N<sub>5</sub><sup>-</sup>*. (b) Hirshfeld surfaces of **1**, pie graph for individual atomic contacts percentage contribution to the Hirshfeld surface and two-dimensional fingerprint plot in crystal stacking for **1**.

## 5. Surface electrostatic potential

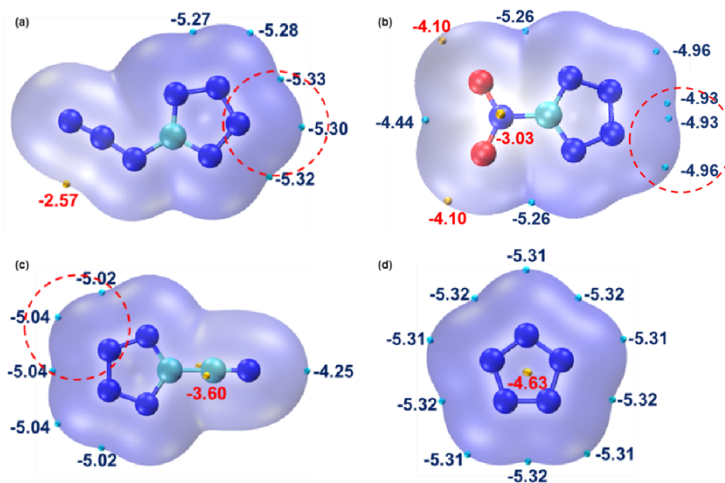

**Fig. S5** Surface electrostatic potential of 5-azidotetrazolate (a), 5-nitrotetrazolate (b), 5-cyanotetrazolate (c), and *cyclo-N<sub>5</sub><sup>-</sup>* anion (d).

## 6. DSC curve

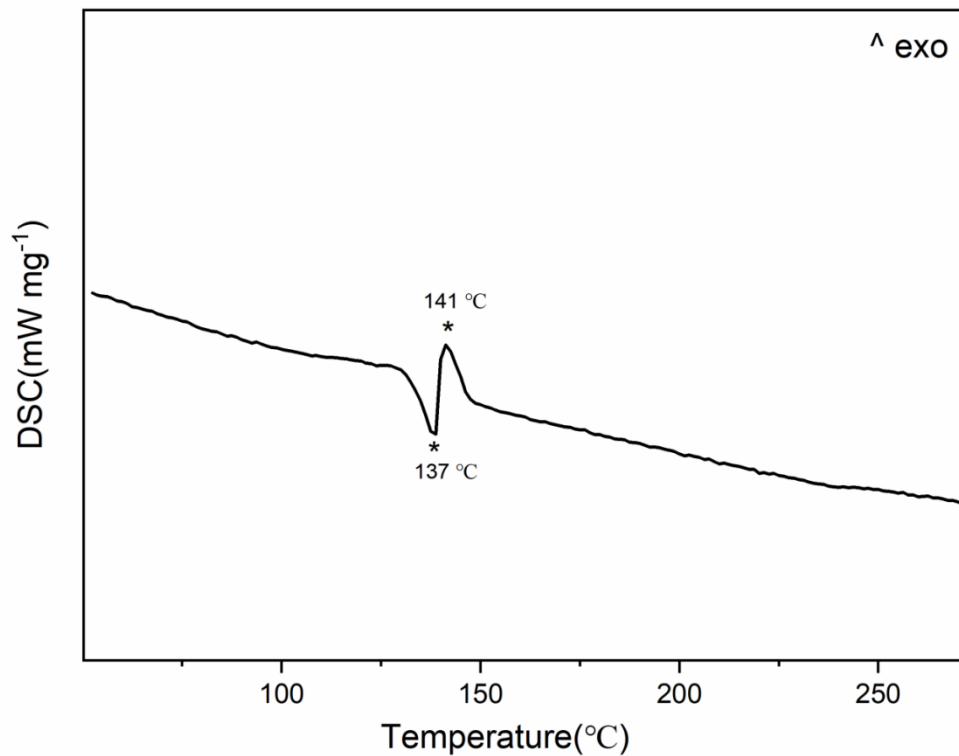

**Fig. S6** The DSC curve of **1** with a heating rate of 5 K min<sup>-1</sup>.

## 7. Experimental section

### 7.1 Caution

Although no explosion or hazards were observed during the preparation and handling of these energetic compounds, all the materials investigated are potentially energetic materials. Small-scale syntheses are strongly encouraged. Manipulations must be carried out in a hood behind a safety shield. Eye protection and leather gloves must be worn at all times.

### 7.2 General methods

All reagents were purchased from Energy chemical in analytical grade and were used as supplied, if not stated otherwise. The decomposition (onset) points were obtained on a differential scanning calorimeter (NETZSCH DSC 204 F1 Phoenix) at a scan rate of  $5\text{ }^{\circ}\text{C min}^{-1}$  in closed Al containers with a high-purity nitrogen flow of  $50\text{ mL min}^{-1}$ . IR spectra were recorded on a Thermo Nicolet iS10 spectrometer equipped with a Thermo Scientific Smart iTR diamond ATR accessory. Elemental analyses were carried out on a vario EL III CHNOS elemental analyzer.

### 7.3 X-ray crystallography

A colourless needle crystal of dimensions  $0.08 \times 0.05 \times 0.04\text{ mm}^3$  was mounted on a Bruker Smart Apex-II diffractometer using Mo-K $\alpha$  radiation ( $\lambda = 0.71073\text{ \AA}$ ) with a graphite monochromator at 100 K. An Oxford Cobra low-temperature device was used to maintain the low temperature. Integration and scaling of intensity data was accomplished using the SAINT program<sup>1</sup>. The structures were solved by intrinsic using SHELXT2015<sup>2</sup> and refinement was carried out by a full-matrix least-squares technique using SHELXL2014<sup>3</sup>. The hydrogen atoms were refined isotropically, and the heavy atoms were refined anisotropically. N-H and O-H hydrogens were located from different electron density maps. Data were corrected for the effects of absorption using SADABS<sup>4</sup>. Relevant crystal data and refinement results are summarized in Table S1.

### 7.4 Synthesis procedures

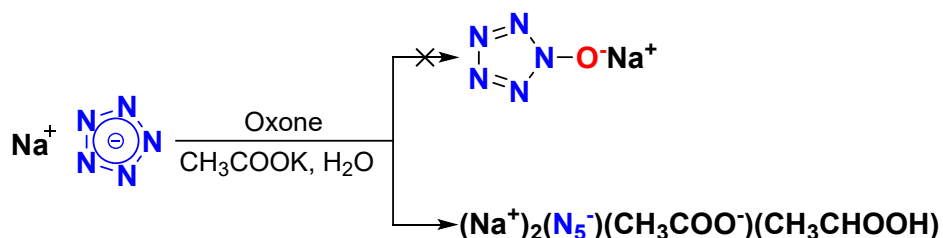

**Scheme. S1** The oxidation of cyclo-N<sub>5</sub><sup>-</sup>.

Na(H<sub>2</sub>O)(N<sub>5</sub>)·2H<sub>2</sub>O was synthesized according to our previously published procedures.<sup>5</sup>

Na(H<sub>2</sub>O)(N<sub>5</sub>)·2H<sub>2</sub>O (0.147 g, 1 mmol) was dissolved in 5 mL of distilled water, and potassium acetate (0.86 g, 8.75 mmol) was added. The solution was stirred at room temperature, and Oxone (3.87 g, 6.3 mmol) was added slowly. After stirring of the

suspension for 20 h at 40 °C, the solution was poured into 60 mL of acetone and the precipitated salts were filtered off. After evaporation of the solvent under reduced pressure, the remaining solid was dissolved in ethanol. The insoluble residues were filtered off, and the filtrate was left for crystallization give colorless crystals of **1** 0.054 g, Yield 46 %.  $T_d$ : 139 °C. IR (ATR): 3429, 2049, 1733, 1617, 1567, 1229, 1032, 637  $\text{cm}^{-1}$ . Elem anal. Calcd (%) for  $\text{C}_4\text{H}_7\text{Na}_2\text{N}_5\text{O}_4$  (MW = 235.11): C 20.43, N 29.79, H 3.00; Found: C 20.35, N 29.86, H 2.92.

## 8. Computational methods

### 8.1 Geometric optimization and energy evaluation

All initial geometries involved in this study were optimized using the M06-2X density functional method<sup>6</sup> with Grimme's DFT-D3 dispersion correction<sup>7</sup>, in combination with the def2-SVP basis set<sup>8</sup>. The thermodynamic correction energies for all configurations were obtained by harmonic frequency calculations at M06-2X-D3/def2-SVP based on the geometry optimized at the same level and at the experimental temperature 40 °C. Solvent effects were implicitly taken into account by means of solvation model based on density (SMD) method<sup>9</sup> with water. The zero-point energies were scaled by a factor of 0.9700 to reduce the systematic error and account for the anharmonic effect. The reactant (R1) and product (P1) configurations having no imaginary frequency, and transition state (TS1) having one imaginary mode. Above calculations were performed using Gaussian 09 suite of program<sup>10</sup>. The energy of all the optimized configurations was evaluated using the double-hybrid functional PWPB95<sup>11</sup> in conjunction with a very large basis set, def2-QZVPP<sup>8</sup>, and SMD method with water were employed. The accuracy of the PWPB95-D3(BJ)/def2-QZVPP level is very close to the well-recognized gold standard CCSD(T)/CBS.<sup>12</sup> Therefore, ORCA 5.0.1<sup>13</sup> was used to perform PWPB95-D3(BJ) calculations, and to reduce the computational time, the resolution-of-identity (RI) technique<sup>14</sup> was used to accelerate both the self-consistent field (SCF) process and second-order perturbative correction part. The loss of accuracy owing to the RI was negligible.<sup>12</sup>

### 8.2 Wavefunction analyses

Atomic charges (ADCH), surface electrostatic potential (ESP), HOMO-LUMO orbitals, and orbital-weighted dual descriptor analyses for 5-azidotetrazolate, 5-nitrotetrazolate, 5-cyanotetrazolate, and *cyclo*-N<sub>5</sub><sup>-</sup> anions were completed using Multiwfn 3.8<sup>15</sup>. Unless otherwise specified, default settings were used throughout the calculations. All isosurface maps were rendered by the VMD 1.9.3 program<sup>16</sup> based on the outputs of Multiwfn. The wavefunctions used in all analyses were produced at the M062X/6-31+G(d,p) level.

### 8.3 Compound coordinates

#### Reactant

**E = -1048.7530 a.u. G = -1048.8153 a.u.**

|   |             |             |             |
|---|-------------|-------------|-------------|
| S | 1.98687300  | -0.10901300 | 0.30848900  |
| O | 0.99563500  | -0.89039200 | 1.05374700  |
| O | 2.60382900  | 0.99289500  | 1.04701300  |
| O | 2.90810300  | -0.91789400 | -0.49243700 |
| O | 1.09244500  | 0.77238500  | -0.79877600 |
| O | 0.35528300  | -0.11779600 | -1.60714900 |
| N | -1.96688700 | -0.03673400 | -0.29590200 |
| N | -2.89990000 | 0.83770600  | -0.56871000 |
| N | -3.88346600 | 0.63014700  | 0.26232500  |
| N | -3.55441000 | -0.37165100 | 1.04422100  |
| N | -2.36666500 | -0.78514700 | 0.69898700  |

H -0.52789900 -0.14094300 -1.11803400

**Transition state**

**E = -1048.7167 a.u. G = -1048.7591 a.u.**

|   |             |             |             |
|---|-------------|-------------|-------------|
| S | 2.32195826  | 0.08634138  | 0.05524144  |
| O | 1.35484423  | 0.71402628  | 1.02055979  |
| O | 2.81637618  | 1.06342365  | -0.93238695 |
| O | 3.40743002  | -0.63534998 | 0.74330405  |
| O | 1.45833469  | -0.99252986 | -0.69698394 |
| O | -0.26016435 | -0.61972662 | -0.42594402 |
| N | -2.00764190 | -0.15293325 | -0.02835459 |
| N | -2.51937644 | 1.03971016  | -0.09862383 |
| N | -3.80994027 | 0.89071265  | 0.02009916  |
| N | -4.06852010 | -0.39128570 | 0.15163134  |
| N | -2.93999841 | -1.04473402 | 0.11773412  |
| H | 0.05244141  | -0.01049886 | 0.31034208  |

**Product**

***cyclo-N<sub>5</sub>O<sup>-</sup>***

**E = -348.9492 a.u. G = -348.9799 a.u.**

|   |             |             |             |
|---|-------------|-------------|-------------|
| O | 1.91249063  | -0.00000870 | 0.00003407  |
| N | 0.65243332  | -0.00000039 | -0.00011238 |
| N | -0.09195240 | 1.08411167  | 0.00004983  |
| N | -1.32710095 | 0.65188725  | -0.00001938 |
| N | -1.32711448 | -0.65188185 | 0.00000251  |
| N | -0.09196907 | -1.08410672 | 0.00004048  |

***HSO<sub>4</sub><sup>-</sup>***

**E = -699.8448 a.u. G = -699.8773 a.u.**

|   |             |             |             |
|---|-------------|-------------|-------------|
| S | -0.13022826 | -0.02086473 | 0.00004705  |
| O | 1.44490753  | 0.42466784  | -0.00127590 |
| O | -0.80697076 | 1.27789148  | -0.00037952 |
| O | -0.31438531 | -0.80786177 | -1.22727398 |
| O | -0.31266247 | -0.80598650 | 1.22886851  |
| H | 1.99654025  | -0.37585280 | -0.00026566 |

## References

- 1 Bruker, *SAINT v8.34A*, Bruker AXS Inc., Madison, Wisconsin, USA, 2013.
- 2 G. M. Sheldrick, *Acta Cryst.*, 2015, **C71**, 3-8.
- 3 G. M. Sheldrick, *Acta Cryst.*, 2015, **A71**, 3-8.
- 4 Bruker, *SADABS v2014/5*, Bruker AXS Inc., Madison, Wisconsin, USA, 2014.
- 5 Y. Xu, Q. Wang, C. Shen, Q. Lin, P. Wang and M. Lu, *Nature*, 2017, **549**, 78-81.
- 6 Y. Zhao and D. G. Truhlar, *Theor. Chem. Account.*, 2008, **120**, 215-241.
- 7 S. Grimme, J. Antony, S. Ehrlich and H. Krieg, *J. Chem. Phys.*, 2010, **132**, 154104.
- 8 F. Weigend and R. Ahlrichs, *Phys. Chem. Chem. Phys.*, 2005, **7**, 3297-3305.
- 9 A. V. Marenich, C. J. Cramer, D. G. Truhlar, *J. Phys. Chem. B.*, 2009, **113**, 6378– 6396.
- 10 M. J. Frisch, G. W. Trucks, H. B. Schlegel, G. E. Scuseria, M. A. Robb, J. R. Cheeseman, G. Scalmani, V. Barone, B. Mennucci, G. A. Petersson, H. Nakatsuji, M. Caricato, X. Li, H. P. Hratchian, A. F. Izmaylov, J. Bloino, G. Zheng, J. L. Sonnenberg, M. Hada, M. Ehara, K. Toyota, R. Fukuda, J. Hasegawa, M. Ishida, T. Nakajima, Y. Honda, O. Kitao, H. Nakai, T. Vreven, J. A. Montgomery, Jr., J. E. Peralta, F. Ogliaro, M. Bearpark, J. J. Heyd, E. Brothers, K. N. Kudin, V. N. Staroverov, T. Keith, R. Kobayashi, J. Normand, K. Raghavachari, A. Rendell, J. C. Burant, S. S. Iyengar, J. Tomasi, M. Cossi, N. Rega, J. M. Millam, M. Klene, J. E. Knox, J. B. Cross, V. Bakken, C. Adamo, J. Jaramillo, R. Gomperts, R. E. Stratmann, O. Yazyev, A. J. Austin, R. Cammi, C. Pomelli, J. W. Ochterski, R. L. Martin, K. Morokuma, V. G. Zakrzewski, G. A. Voth, P. Salvador, J. J. Dannenberg, S. Dapprich, A. D. Daniels, O. Farkas, J. B. Foresman, J. V. Ortiz, J. Cioslowski, and D. J. Fox, *Gaussian 09, Revision E.01*, Gaussian, Inc., Wallingford CT, 2013.
- 11 L. Goerigk and S. Grimme, *J. Chem. Theory Comput.*, 2011, **7**, 291-309.
- 12 L. Goerigk and S. Grimme, *Phys. Chem. Chem. Phys.*, 2011, **13**, 6670-6688.
- 13 F. Neese, F. Wennmohs, U. Becker and C. Riplinger, *J. Chem. Phys.*, 2020, **152**, 224108.
- 14 F. Weigend, *Phys. Chem. Chem. Phys.*, 2002, **4**, 4285-4291.
- 15 T. Lu, F. Chen, *J. Comput. Chem.*, 2012, **33**, 580-592.
- 16 W. Humphrey, A. Dalke and K. Schulten, *J. Mol. Graph.*, 1996, **14**, 33-38.
